# Supplementary material for: Rational design of a molecularly imprinted polymer for dinotefuran: theoretical and experimental studies aimed at the development of an efficient adsorbent for microextraction by packed sorbent
Source: Royal Society of Chemistry journal article supplement (doi:10.1039/c7an01324h), 2017-10-20
Supplement: c7an01324h1.pdf [file c7an01324h1.pdf]

## Supplementary material

### **Rational design of a molecular imprinting polymer for dinotefuran: Theoretical and experimental studies aiming the development of an efficient adsorbent for microextraction by packed sorbent**

Camilla Fonseca Silva, Keyller Bastos Borges\* and Clebio Soares do Nascimento Jr.\*

Departamento de Ciências Naturais, Universidade Federal de São João del-Rei, Campus Dom Bosco, Praça Dom Helvécio 74, Fábricas, 36301-160, São João del-Rei, Minas Gerais, Brazil.

#### **\*Correspondence:**

Prof. Keyller Bastos Borges, Ph.D., Departamento de Ciências Naturais, Universidade Federal de São João del-Rei, Campus Dom Bosco, Praça Dom Helvécio 74, Fábricas, 36301-160, São João del-Rei, Minas Gerais, Brazil

e-mail: [keyller@ufsj.edu.br](mailto:keyller@ufsj.edu.br)

Prof. Clebio Soares Nascimento Jr., Ph.D., Departamento de Ciências Naturais, Universidade Federal de São João del-Rei, Campus Dom Bosco, Praça Dom Helvécio 74, Fábricas, 36301-160, São João del-Rei, Minas Gerais, Brazil

e-mail: [clebio@ufsj.edu.br](mailto:clebio@ufsj.edu.br)

Phone: +55 32 3379 – 2481

Fax: +55 32 3379 – 2483

## Figures

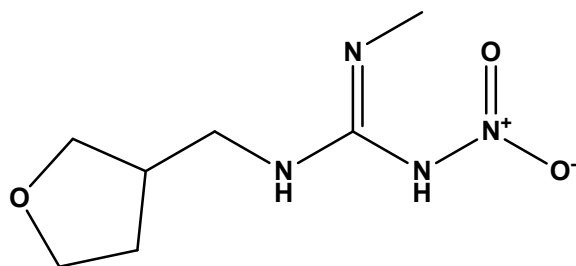

**Figure S1.** Chemical structure of dinotefuran (DNF).

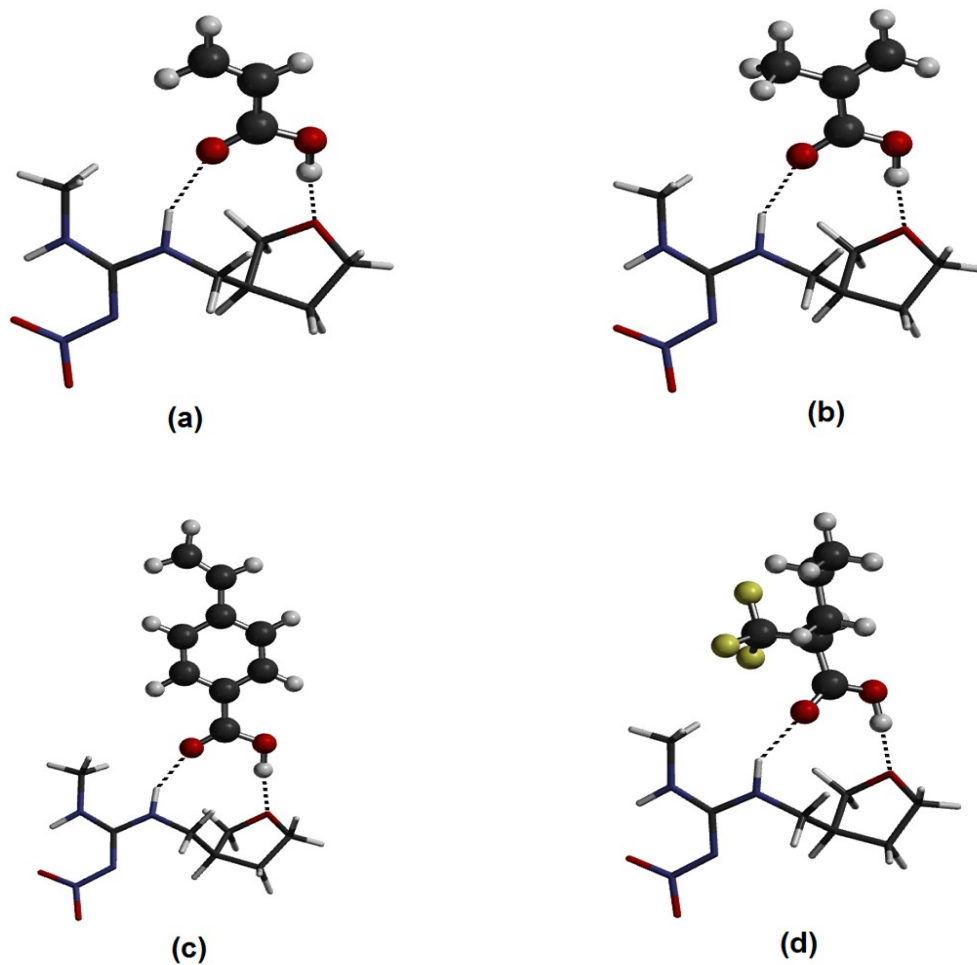

**Figure S2.** B3LYP/6-311G(d,p) optimized structures for the 1:1 FM/template complexes: (a) DNF-(AA)<sub>1</sub>; (b) DNF-(MAA)<sub>1</sub>; (c) (DNF-APA)<sub>1</sub>; (d) DNF-(TFMAA)<sub>1</sub>. The hydrogen bonds were drawn in dotted lines to ease the visualization.

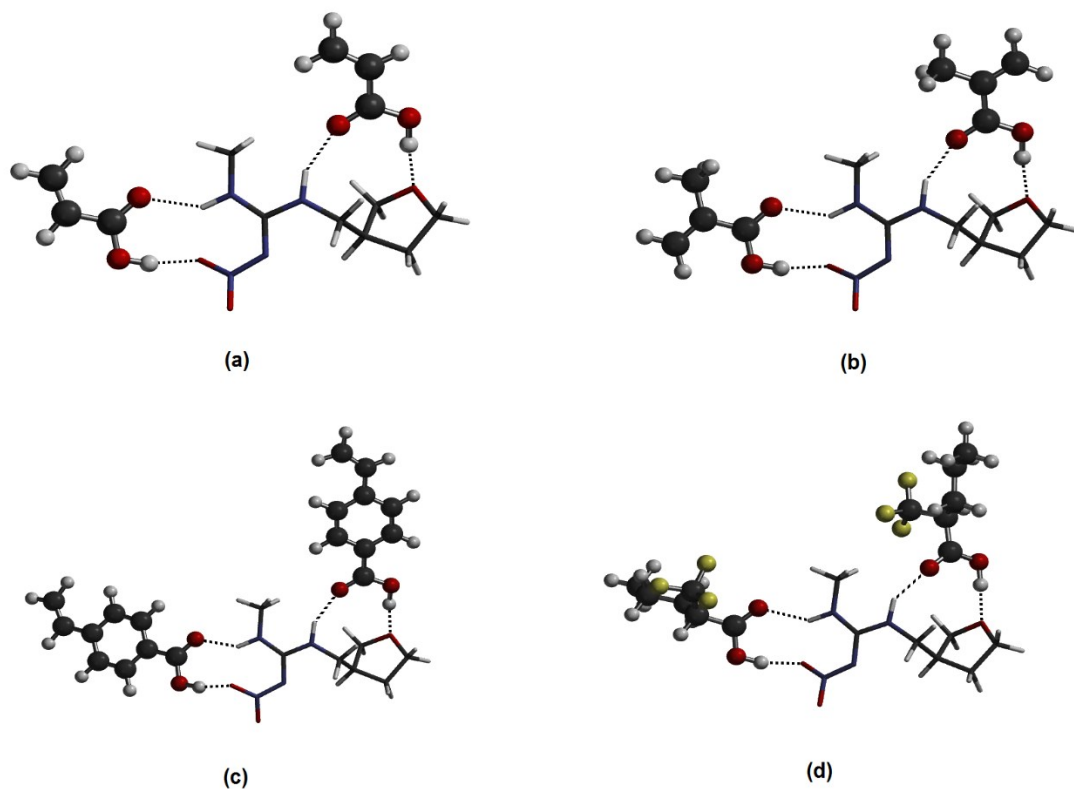

**Figure S3.** B3LYP/6-311G(d,p) optimized structures for the 1:2 FM/template complexes: (a) DNF-(AA)<sub>2</sub>; (b) DNF-(MAA)<sub>2</sub>; (c) (DNF-APA)<sub>2</sub>; (d) DNF-(TFMAA)<sub>2</sub>. The hydrogen bonds were drawn in dotted lines to ease the visualization.

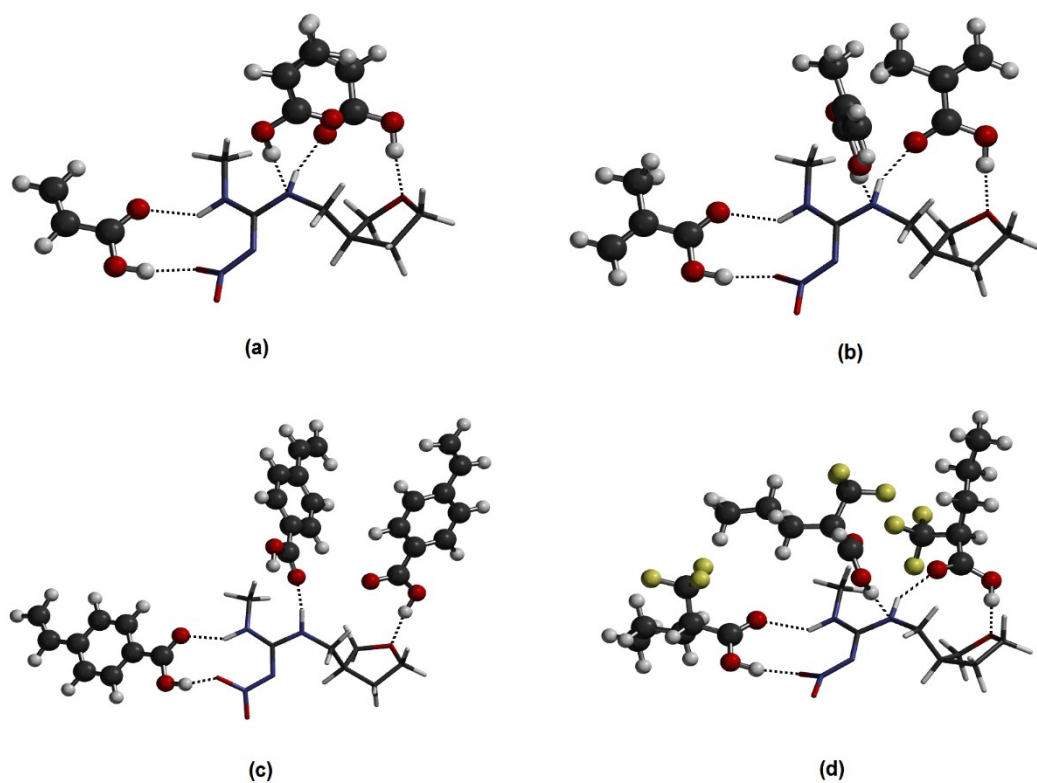

**Figure S4.** B3LYP/6-311G(d,p) optimized structures for the 1:3 FM/template complexes: (a) DNF-(AA)<sub>3</sub>; (b) DNF-(MAA)<sub>3</sub>; (c) (DNF-APV)<sub>3</sub>; (d) DNF-(TFMAA)<sub>3</sub>. The hydrogen bonds were drawn in dotted lines to ease the visualization.

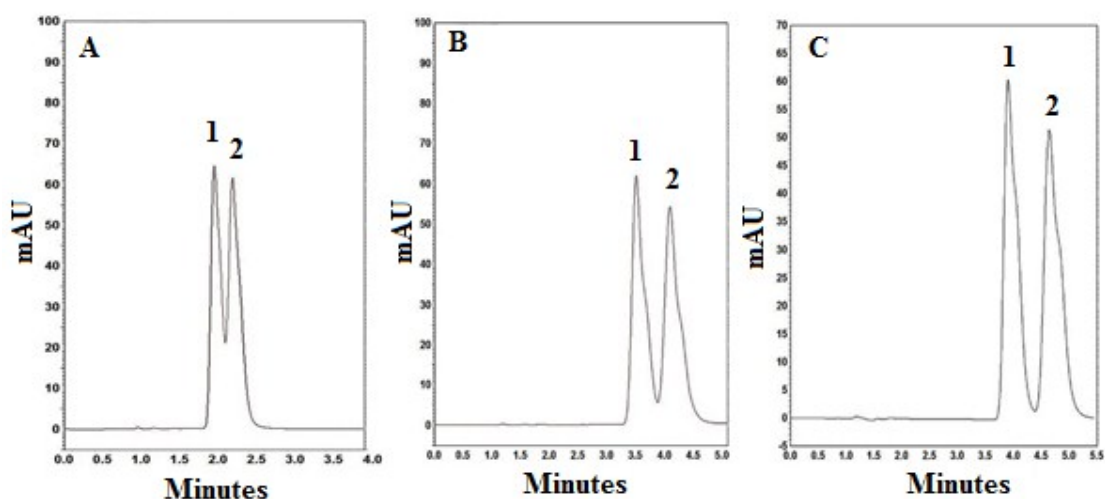

**Figure S5.** (A) Chromatogram referring to enantioseparation of dinotefuran employing 85% hexane, 5% ethanol, 10% methanol as mobile phase and flow rate of  $1.2 \text{ mL min}^{-1}$ ; (B) Chromatogram referring to enantioseparation of dinotefuran employing 80% hexane, 10% ethanol, 10% methanol plus 0.1% diethylamine and flow rate of  $1.2 \text{ mL min}^{-1}$ ; (C) Chromatogram referring to enantioseparation of dinotefuran employing 83% hexane, 11% ethanol, 6% methanol plus 0.25% diethylamine and flow rate of  $1.2 \text{ mL min}^{-1}$ . (1) (+)-(*S*)-DNF and (2) (–)-(*R*)-DNF.

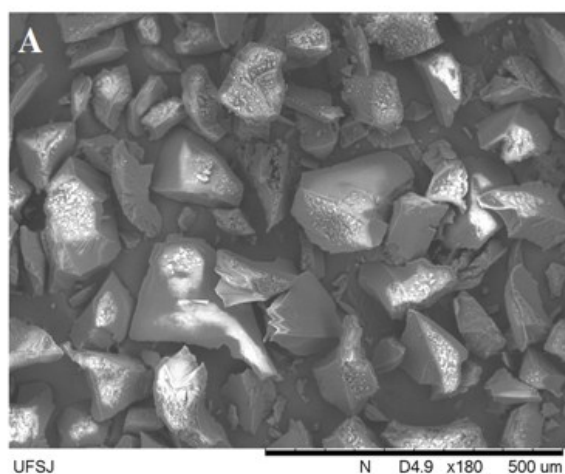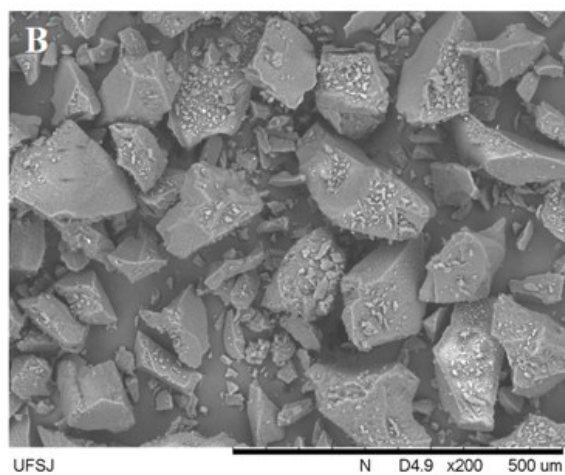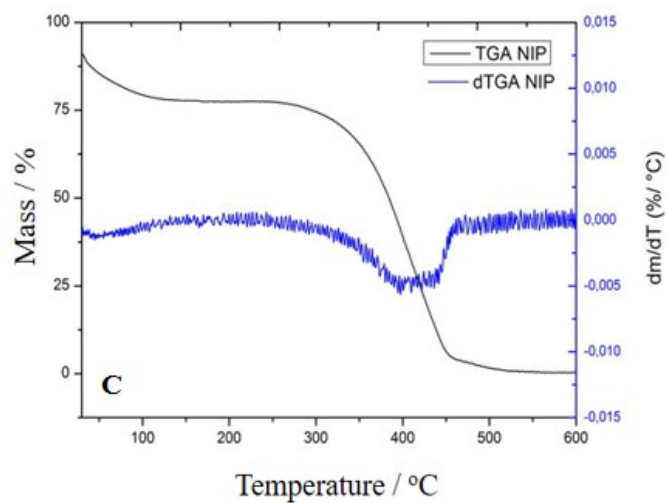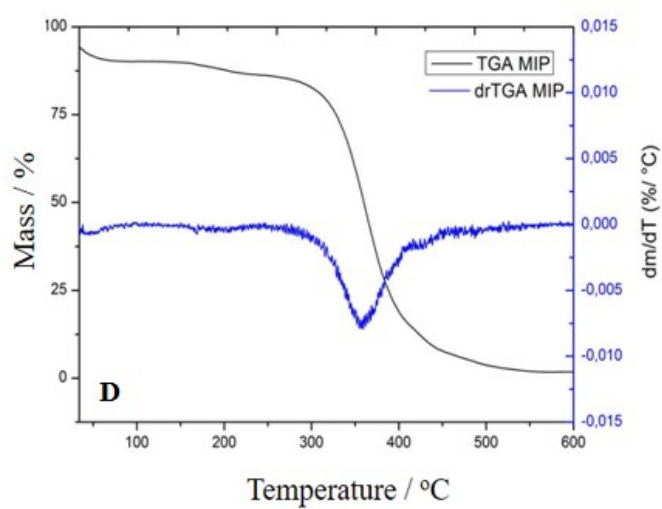

**Figure S6.** Micrographs of the (A) NIP at magnifications of 180 $\times$  and (B) MIP at magnifications of 200  $\times$  and TGA and DrTGA of (C) NIP and (D) MIP.
